# Supplementary material
Source: MDPI journal article supplement (https://www.mdpi.com/2075-163X/14/4/360)
Supplement: s1 [file s1]

## Article

# Transport Model of Rare Earth Elements in Weathering Crusts during Electrokinetic Mining

Gaofeng Wang <sup>1,2,3</sup>, Bowen Ling <sup>4,5</sup>, Xiaoliang Liang <sup>1,2,3</sup>, Jie Xu <sup>1,2,3</sup>, Shichang Kang <sup>1,2,3</sup>, Jingming Wei <sup>1,2,3</sup>, Wei Tan <sup>1,2,3</sup>, Runliang Zhu <sup>1,2,3</sup>, Jianxi Zhu <sup>1,2,3,\*</sup> and Hongping He <sup>1,2,3</sup>

<sup>1</sup> CAS Key Laboratory of Mineralogy and Metallogeny/Guangdong Provincial Key Laboratory of Mineral Physics and Material, Guangzhou Institute of Geochemistry, Chinese Academy of Sciences, Guangzhou 510640, China; wanggaofeng@gig.ac.cn (G.W.); liangxl@gig.ac.cn (X.L.); xujie777@gig.ac.cn (J.X.); kangshichang@gig.ac.cn (S.K.); weijm@gig.ac.cn (J.W.); tanwei@gig.ac.cn (W.T.); zhurl@gig.ac.cn (R.Z.); hehp@gig.ac.cn (H.H.)

<sup>2</sup> CAS Center for Excellence in Deep Earth Science, Guangzhou 510640, China

<sup>3</sup> University of Chinese Academy of Sciences, Beijing 100049, China

<sup>4</sup> Key Laboratory for Mechanics in Fluid Solid Coupling Systems, Institute of Mechanics, Chinese Academy of Sciences, Beijing 100190, China; lingbowen@imech.ac.cn

<sup>5</sup> School of Engineering Science, University of Chinese Academy of Sciences, Beijing 100049, China

\* Correspondence: zhujx@gig.ac.cn

## Supplementary Material

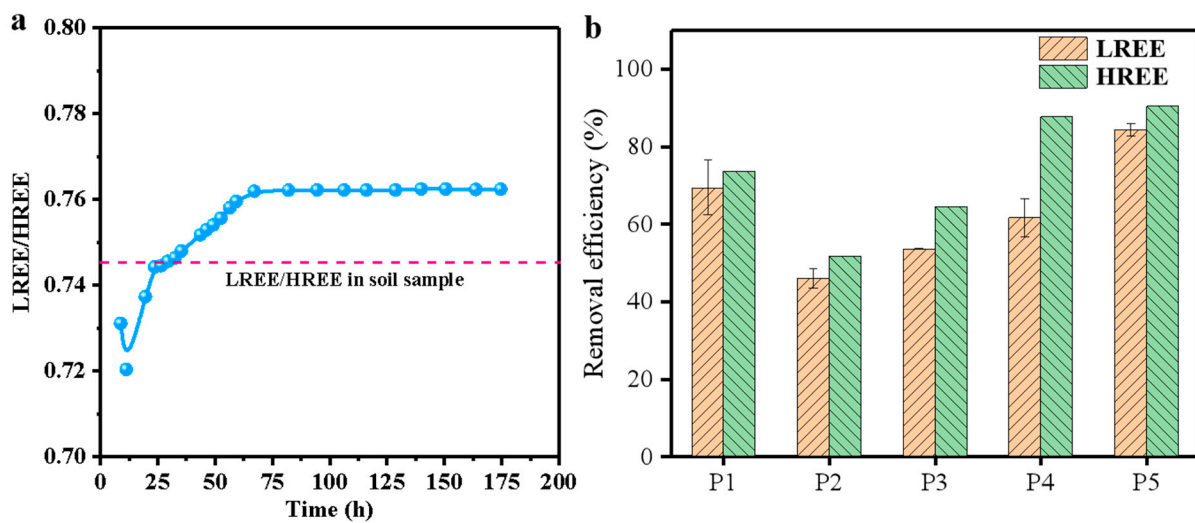

**Figure S1.** (a) Variation of LREE/HREE ratio in the collected leachate with increasing EKM treatment time. (b) LREE/HREE ratio in weathering crust after the EKM treatment.

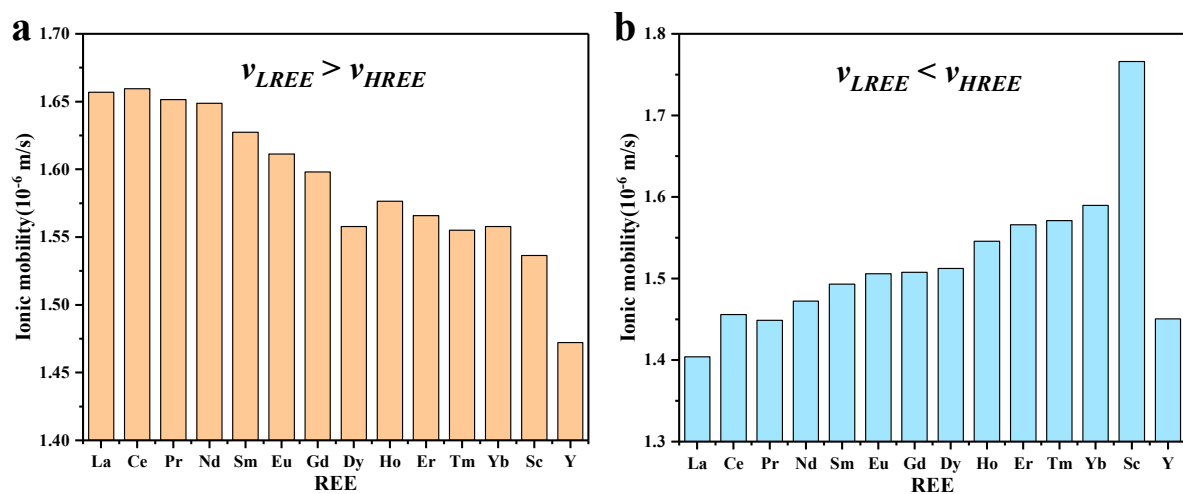

**Figure S2.** Electromigration velocities of REEs in weathering crust calculated based on the (a) conventional and (b) newly proposed models.
